# Supplementary material
Source: publisher figshare collection journal article supplement (https://aacr.figshare.com/articles/dataset/_/22478751)
Supplement: Supplementary file 1 [file 39930249]

**Safety and Immunogenicity of LY3415244, a Bispecific Antibody Against TIM-3 and PD-L1, in Patients With Advanced Solid Tumors**

**Supplemental Table 3. Treatment-emergent Adverse Events Considered Related to Study Treatment**

| Preferred Term <sup>a</sup> , n (%) | Cohort A1<br>(3 mg)<br>N = 3 | Cohort A2<br>(10 mg)<br>N = 3 | Cohort A3<br>(30 mg)<br>N = 3 | Cohort A4<br>(70 mg)<br>N = 3 |
|-------------------------------------|------------------------------|-------------------------------|-------------------------------|-------------------------------|
| ≥1 TEAE                             | 2 (66.7)                     | 2 (66.7)                      | 2 (66.7)                      | 2 (66.7)                      |
| Constipation                        | 0 (0.0)                      | 1 (33.3)                      | 0 (0.0)                       | 0 (0.0)                       |
| Dry mouth                           | 0 (0.0)                      | 1 (33.3)                      | 0 (0.0)                       | 0 (0.0)                       |
| Nausea                              | 1 (33.3)                     | 0 (0.0)                       | 0 (0.0)                       | 0 (0.0)                       |
| Fatigue                             | 0 (0.0)                      | 0 (0.0)                       | 0 (0.0)                       | 1 (33.3)                      |
| Infusion-related reaction           | 0 (0.0)                      | 1 (33.3)                      | 0 (0.0)                       | 1 (33.3)                      |
| Increased amylase                   | 0 (0.0)                      | 1 (33.3)                      | 0 (0.0)                       | 0 (0.0)                       |
| Increased eosinophil count          | 0 (0.0)                      | 0 (0.0)                       | 1 (33.3)                      | 0 (0.0)                       |
| Increased lipase                    | 0 (0.0)                      | 1 (33.3) <sup>b</sup>         | 0 (0.0)                       | 0 (0.0)                       |
| Increased weight                    | 1 (33.3)                     | 0 (0.0)                       | 0 (0.0)                       | 0 (0.0)                       |
| Decreased white blood cell count    | 0 (0.0)                      | 1 (33.3)                      | 0 (0.0)                       | 0 (0.0)                       |
| Decreased appetite                  | 1 (33.3)                     | 0 (0.0)                       | 0 (0.0)                       | 0 (0.0)                       |
| Myalgia                             | 0 (0.0)                      | 1 (33.3)                      | 1 (33.3)                      | 0 (0.0)                       |
| Muscular weakness                   | 0 (0.0)                      | 0 (0.0)                       | 1 (33.3)                      | 0 (0.0)                       |
| Cough                               | 1 (33.3)                     | 0 (0.0)                       | 0 (0.0)                       | 0 (0.0)                       |
| Dyspnea                             | 0 (0.0)                      | 1 (33.3)                      | 0 (0.0)                       | 0 (0.0)                       |
| Alopecia                            | 0 (0.0)                      | 0 (0.0)                       | 1 (33.3)                      | 0 (0.0)                       |
| Allergic dermatitis                 | 0 (0.0)                      | 0 (0.0)                       | 1 (33.3)                      | 0 (0.0)                       |
| PPE syndrome                        | 0 (0.0)                      | 0 (0.0)                       | 1 (33.3)                      | 0 (0.0)                       |
| Rash                                | 0 (0.0)                      | 0 (0.0)                       | 0 (0.0)                       | 1 (33.3)                      |
| Maculo-papular rash                 | 0 (0.0)                      | 0 (0.0)                       | 1 (33.3)                      | 0 (0.0)                       |

Abbreviations: PPE, palmar-plantar erythrodysesthesia; TEAE, treatment-emergent adverse event.

<sup>a</sup> TEAEs are listed by preferred term according to MedDRA Version 22.1.

<sup>b</sup> Although no preplanned dose modifications were allowed, 1 patient in Cohort A2 required a dose delay due to an adverse event of grade 4 lipase increase.
